# Supplementary material for: Lipid Biomarker and Carbon Stable Isotope Survey on the Dallol Hydrothermal System in Ethiopia
Source: PubMed Central journal article supplement (PMC6921156; doi:10.1089/ast.2018.1963), 2019-12-04

**Figure S1.** Analytical scheme of the total lipid extract fractionation and target lipid compounds in each fraction.

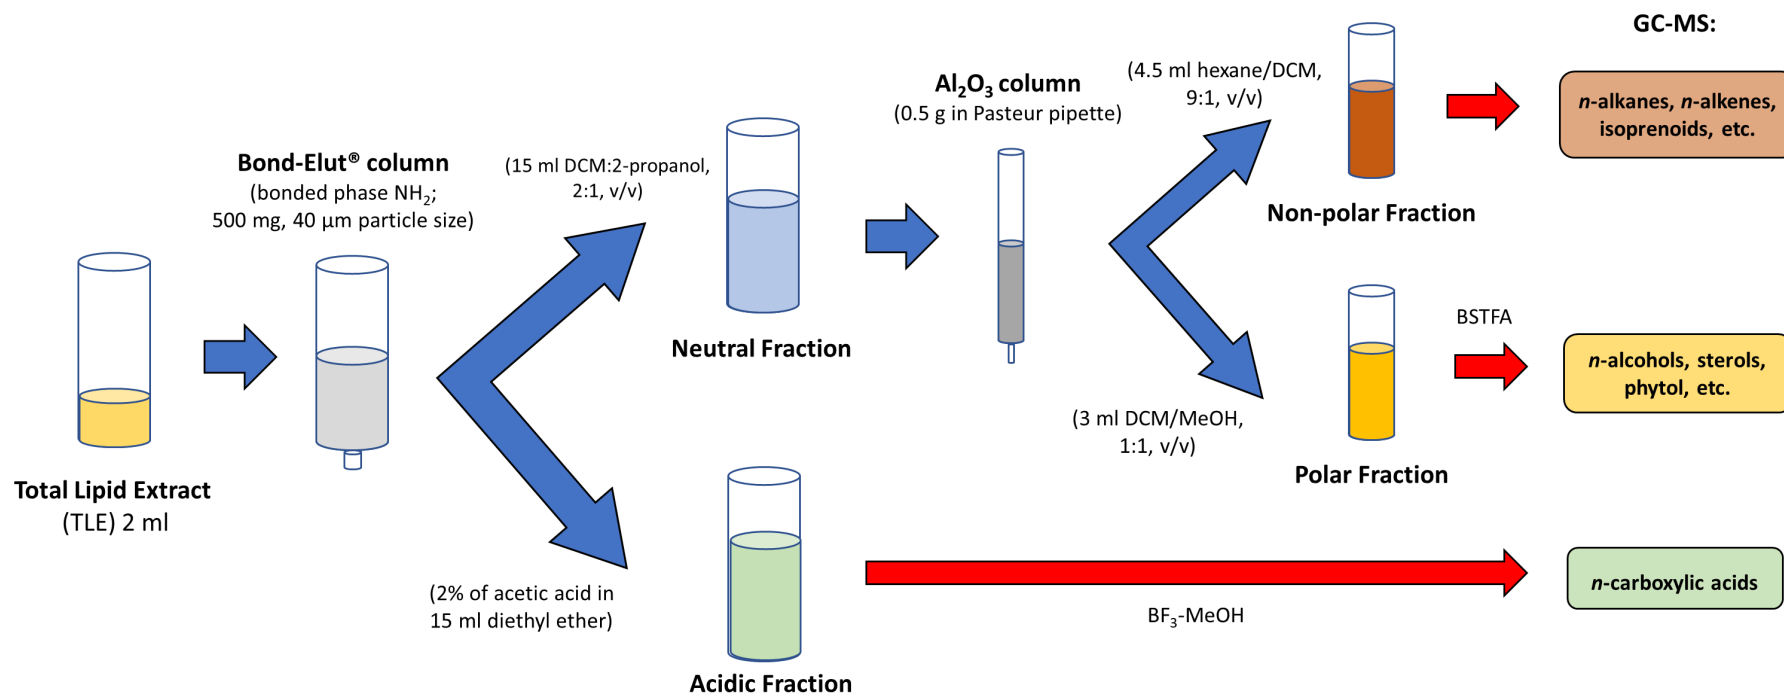

Supplement: Supp_Fig1.pdf [file Supp_Fig1.pdf]
